# Supplementary material for: A rational approach towards enhancing solar water splitting: a case study of Au–RGO/N-RGO–TiO2
Source: Royal Society of Chemistry journal article supplement (doi:10.1039/c5nr02613j), 2015-01-01

**Electronic Supplementary Information**

**A Rational Approach Towards Enhancing Solar Water Splitting : A Case Study of Au – RGO/N-RGO – TiO<sub>2</sub>**

5 Pradnya A. Bharad,<sup>a</sup> Kumarsrinivasan Sivaranjani,<sup>a</sup> and Chinnakonda S. Gopinath\*,<sup>a,b,c</sup>

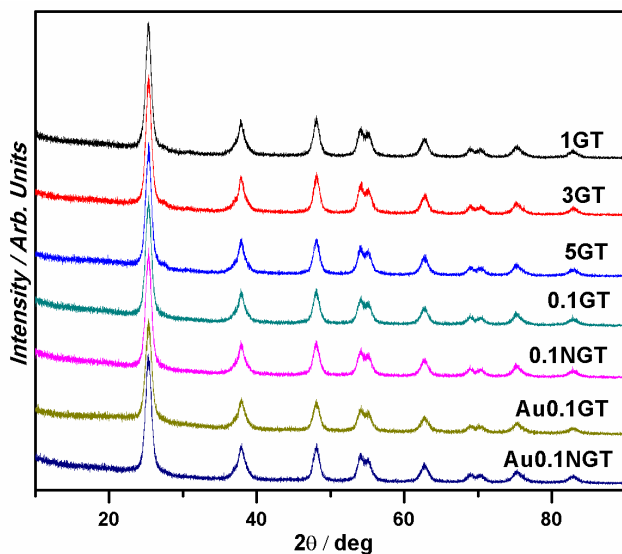

Supplement: c5nr02613j1.pdf [file c5nr02613j1.pdf]
